# Supplementary material
Source: publisher site journal article supplement (https://www.spandidos-publications.com/5894/downloadSupplementary)
Supplement: Supplementary file 1 [file downloadSupplementary]

## Sheet: Comparison(SCD, MT, and TG)
Table SV. Comparisons of the Differentially expressed phosphorylated proteins (DEPPs) among the MI-SCD (myocardial ischemia) group, MT-MI (MitoTEMPO-myocardial ischemia) group, and TG-MI (Transgenic-myocardial ischemia) group.
Protein-ID	SCD-p	SCD-FC	MT-p	MT-FC	TG-p	TG-FC	Gene-ID	Protein names
Q6ZWY9	3.29877e-05	3.04446	0.00255895	0.695243	NS	NS	H2bc4	H2B clustered histone 4(H2bc4)
Q9CXV1	0.000694356	2.46273	NS	NS	NS	NS	Sdhd	succinate dehydrogenase complex, subunit D, integral membrane protein(Sdhd)
Q9D7B6	4.70415e-05	2.31993	0.00695957	0.795818	NS	NS	Acad8	acyl-Coenzyme A dehydrogenase family, member 8(Acad8)
P56375	0.00589136	2.25878	NS	NS	NS	NS	Acyp2	acylphosphatase 2, muscle type(Acyp2)
P46425	0.0183094	2.0215	NS	NS	NS	NS	Gstp2	glutathione S-transferase, pi 2(Gstp2)
P01942	9.77248e-07	2.01361	NS	NS	NS	NS	Hba-a1	hemoglobin alpha, adult chain 1(Hba-a1)
Q8CAQ8	0.000530378	2.00933	NS	NS	NS	NS	Immt	inner membrane protein, mitochondrial(Immt)
O08528	0.00547069	1.98759	NS	NS	NS	NS	Hk2	hexokinase 2(Hk2)
P34884	0.0211386	1.94766	NS	NS	NS	NS	Mif	macrophage migration inhibitory factor (glycosylation-inhibiting factor)(Mif)
O08709	0.0102435	1.94687	NS	NS	NS	NS	Prdx6	peroxiredoxin 6(Prdx6)
P07724	5.63368e-07	1.92604	0.048795	1.21028	NS	NS	Alb	albumin(Alb)
P60843	0.000537849	1.91562	NS	NS	NS	NS	Eif4a1	eukaryotic translation initiation factor 4A1(Eif4a1)
P05064	0.000221705	1.86122	5.25351e-06	1.17226	NS	NS	Aldoa	aldolase A, fructose-bisphosphate(Aldoa)
Q9JLZ3	0.000374012	1.85984	NS	NS	NS	NS	Auh	AU RNA binding protein/enoyl-coenzyme A hydratase(Auh)
Q8R1Q8	0.0157757	1.81106	0.00202258	2.26593	NS	NS	Dync1li1	dynein cytoplasmic 1 light intermediate chain 1(Dync1li1)
Q921I1	1.52535e-11	1.8058	0.00976277	1.13257	NS	NS	Trf	transferrin(Trf)
P52503	0.0364208	1.79373	NS	NS	NS	NS	Ndufs6	NADH:ubiquinone oxidoreductase core subunit S6(Ndufs6)
P07758	0.00347181	1.78309	0.0431269	1.43416	NS	NS	Serpina1a	serine (or cysteine) peptidase inhibitor, clade A, member 1A(Serpina1a)
P18242	0.00098538	1.75971	0.0286218	0.803396	NS	NS	Ctsd	cathepsin D(Ctsd)
Q9D0S9	0.000111082	1.74963	NS	NS	NS	NS	Hint2	histidine triad nucleotide binding protein 2(Hint2)
Q9QY76	0.0211517	1.73248	NS	NS	NS	NS	Vapb	vesicle-associated membrane protein, associated protein B and C(Vapb)
P62897	0.000499815	1.71979	0.00551409	1.50721	NS	NS	Cycs	cytochrome c, somatic(Cycs)
Q8BSY0	0.0163835	1.6788	NS	NS	NS	NS	Asph	aspartate-beta-hydroxylase(Asph)
Q9CQ69	0.00198547	1.67369	NS	NS	NS	NS	Uqcrq	ubiquinol-cytochrome c reductase, complex III subunit VII(Uqcrq)
Q9CQZ5	0.0149525	1.65388	NS	NS	NS	NS	Ndufa6	NADH:ubiquinone oxidoreductase subunit A6(Ndufa6)
Q9D0F9	0.0222196	1.62718	NS	NS	NS	NS	Pgm1	phosphoglucomutase 1(Pgm1)
P21107	1.14653e-08	1.61533	0.0485784	0.89687	0.00290895	0.576041	Tpm3	tropomyosin 3, gamma(Tpm3)
P51667	0.000312731	1.61492	0.0273491	0.823447	NS	NS	Myl2	myosin, light polypeptide 2, regulatory, cardiac, slow(Myl2)
Q7TMD7	0.0023248	1.61394	NS	NS	NS	NS	Dsg4	desmoglein 4(Dsg4)
Q01768	1.33668e-05	1.61307	0.000101938	1.24522	NS	NS	Nme2	NME/NM23 nucleoside diphosphate kinase 2(Nme2)
Q9Z1P6	0.0167281	1.60881	NS	NS	NS	NS	Ndufa7	NADH:ubiquinone oxidoreductase subunit A7(Ndufa7)
Q99KR7	0.00146554	1.58734	NS	NS	NS	NS	Ppif	peptidylprolyl isomerase F (cyclophilin F)(Ppif)
Q9CPQ8	1.31655e-05	1.58728	NS	NS	NS	NS	Atp5l	ATP synthase, H+ transporting, mitochondrial F0 complex, subunit G(Atp5l)
Q8BWF0	0.00197791	1.58322	NS	NS	NS	NS	Aldh5a1	aldhehyde dehydrogenase family 5, subfamily A1(Aldh5a1)
Q9CR21	0.0195976	1.58157	NS	NS	NS	NS	Ndufab1	NADH:ubiquinone oxidoreductase subunit AB1(Ndufab1)
Q9CPQ1	0.000572907	1.58012	NS	NS	NS	NS	Cox6c	cytochrome c oxidase subunit 6C(Cox6c)
P62631	0.000761107	1.56524	NS	NS	NS	NS	Eef1a2	eukaryotic translation elongation factor 1 alpha 2(Eef1a2)
O35855	0.00123211	1.56521	0.0142282	0.742191	NS	NS	Bcat2	branched chain aminotransferase 2, mitochondrial(Bcat2)
Q60930	0.00254489	1.56191	NS	NS	NS	NS	Vdac2	voltage-dependent anion channel 2(Vdac2)
P05202	3.87495e-07	1.55339	NS	NS	NS	NS	Got2	glutamatic-oxaloacetic transaminase 2, mitochondrial(Got2)
P68368	0.00993142	1.54819	0.00172538	0.773603	NS	NS	Tuba4a	tubulin, alpha 4A(Tuba4a)
P07309	0.000156289	1.54196	NS	NS	NS	NS	Ttr	transthyretin(Ttr)
Q61171	0.0217242	1.53714	NS	NS	NS	NS	Prdx2	peroxiredoxin 2(Prdx2)
Q9D0K2	0.00363884	1.53641	NS	NS	NS	NS	Oxct1	3-oxoacid CoA transferase 1(Oxct1)
Q99LX0	0.00167418	1.53291	NS	NS	NS	NS	Park7	Parkinson disease (autosomal recessive, early onset) 7(Park7)
P63038	0.000450973	1.53232	NS	NS	NS	NS	Hspd1	heat shock protein 1 (chaperonin)(Hspd1)
Q8JZQ2	0.000124972	1.5285	0.00178601	0.786404	NS	NS	Afg3l2	AFG3-like AAA ATPase 2(Afg3l2)
Q80XN0	0.000216759	1.52455	NS	NS	NS	NS	Bdh1	3-hydroxybutyrate dehydrogenase, type 1(Bdh1)
Q08857	0.000413083	1.52383	0.0266171	0.80223	NS	NS	Cd36	CD36 molecule(Cd36)
Q99K70	6.31463e-05	1.52167	0.00206014	1.34308	0.0118146	2.90899	Rragc	Ras-related GTP binding C(Rragc)
P00405	0.000486438	1.52003	NS	NS	NS	NS	mt-Co2	cytochrome c oxidase II, mitochondrial(mt-Co2)
Q9WUM5	0.00122619	1.50735	NS	NS	NS	NS	Suclg1	succinate-CoA ligase, GDP-forming, alpha subunit(Suclg1)
Q60932	0.000135296	1.50657	NS	NS	NS	NS	Vdac1	voltage-dependent anion channel 1(Vdac1)
P28650	0.0133158	1.50571	8.07699e-05	2.10219	NS	NS	Adssl1	adenylosuccinate synthetase like 1(Adssl1)
P56135	0.00049487	1.5048	NS	NS	NS	NS	Atp5j2	ATP synthase, H+ transporting, mitochondrial F0 complex, subunit F2(Atp5j2)
P12787	0.000275214	1.50094	NS	NS	NS	NS	Cox5a	cytochrome c oxidase subunit 5A(Cox5a)
P09671	2.94959e-08	1.49718	NS	NS	NS	NS	Sod2	superoxide dismutase 2, mitochondrial(Sod2)
P52480	1.77036e-05	1.488	0.00526521	1.2373	NS	NS	Pkm	pyruvate kinase, muscle(Pkm)
P56382	0.0108956	1.48591	NS	NS	NS	NS	Atp5e	ATP synthase, H+ transporting, mitochondrial F1 complex, epsilon subunit(Atp5e)
P84244	7.6554e-05	1.48459	0.00845253	1.20366	NS	NS	H3f3a	H3.3 histone A(H3f3a)
Q9CQR4	0.00109207	1.48332	NS	NS	NS	NS	Acot13	acyl-CoA thioesterase 13(Acot13)
Q9CR62	0.00379809	1.4709	NS	NS	NS	NS	Slc25a11	solute carrier family 25 (mitochondrial carrier oxoglutarate carrier), member 11(Slc25a11)
Q8BH95	2.64173e-06	1.46691	NS	NS	NS	NS	Echs1	enoyl Coenzyme A hydratase, short chain, 1, mitochondrial(Echs1)
Q9JI91	0.00064188	1.46405	0.032241	0.9012	NS	NS	Actn2	actinin alpha 2(Actn2)
P51174	2.98906e-07	1.45778	NS	NS	NS	NS	Acadl	acyl-Coenzyme A dehydrogenase, long-chain(Acadl)
P05201	0.000586657	1.45759	NS	NS	NS	NS	Got1	glutamic-oxaloacetic transaminase 1, soluble(Got1)
Q60931	0.0024692	1.45169	NS	NS	NS	NS	Vdac3	voltage-dependent anion channel 3(Vdac3)
P08249	6.85048e-06	1.45163	NS	NS	NS	NS	Mdh2	malate dehydrogenase 2, NAD (mitochondrial)(Mdh2)
Q9DC70	0.00015976	1.45007	NS	NS	NS	NS	Ndufs7	NADH:ubiquinone oxidoreductase core subunit S7(Ndufs7)
Q61425	0.000158368	1.44925	NS	NS	NS	NS	Hadh	hydroxyacyl-Coenzyme A dehydrogenase(Hadh)
P51881	9.99445e-05	1.44849	NS	NS	NS	NS	Slc25a5	solute carrier family 25 (mitochondrial carrier, adenine nucleotide translocator), member 5(Slc25a5)
O55126	0.000239495	1.44692	NS	NS	NS	NS	Nipsnap2	nipsnap homolog 2(Nipsnap2)
P63030	0.0301881	1.44541	NS	NS	NS	NS	Mpc1	mitochondrial pyruvate carrier 1(Mpc1)
Q924X2	0.00264478	1.43914	NS	NS	NS	NS	Cpt1b	carnitine palmitoyltransferase 1b, muscle(Cpt1b)
Q8BK30	0.0245842	1.4347	NS	NS	NS	NS	Ndufv3	NADH:ubiquinone oxidoreductase core subunit V3(Ndufv3)
Q9CZU6	0.000534999	1.42936	NS	NS	NS	NS	Cs	citrate synthase(Cs)
P11404	0.000326358	1.4238	NS	NS	NS	NS	Fabp3	fatty acid binding protein 3, muscle and heart(Fabp3)
P58771	2.73804e-10	1.41861	NS	NS	NS	NS	Tpm1	tropomyosin 1, alpha(Tpm1)
Q99LC5	6.69552e-06	1.41145	NS	NS	NS	NS	Etfa	electron transferring flavoprotein, alpha polypeptide(Etfa)
Q64433	0.000201484	1.40577	NS	NS	NS	NS	Hspe1	heat shock protein 1 (chaperonin 10)(Hspe1)
P03930	0.000124386	1.40221	NS	NS	NS	NS	mt-Atp8	ATP synthase 8, mitochondrial(mt-Atp8)
O70373	0.00379824	1.39673	4.70583e-07	2.05059	NS	NS	Xirp1	xin actin-binding repeat containing 1(Xirp1)
P16125	0.000166461	1.39357	NS	NS	NS	NS	Ldhb	lactate dehydrogenase B(Ldhb)
P54071	4.44998e-05	1.39269	NS	NS	NS	NS	Idh2	isocitrate dehydrogenase 2 (NADP+), mitochondrial(Idh2)
Q60994	0.0398365	1.39246	NS	NS	0.0456636	0.364	Adipoq	adiponectin, C1Q and collagen domain containing(Adipoq)
Q8BMF4	0.000112506	1.39141	NS	NS	NS	NS	Dlat	dihydrolipoamide S-acetyltransferase (E2 component of pyruvate dehydrogenase complex)(Dlat)
Q61207	0.0002297	1.39096	0.007901	0.804601	NS	NS	Psap	prosaposin(Psap)
Q8BGK2	0.0155899	1.38817	NS	NS	NS	NS	Adprhl1	ADP-ribosylhydrolase like 1(Adprhl1)
P35700	0.0397021	1.38805	NS	NS	NS	NS	Prdx1	peroxiredoxin 1(Prdx1)
P47757	0.0143058	1.38487	0.000399987	1.69523	0.0085858	1.38089	Capzb	capping protein (actin filament) muscle Z-line, beta(Capzb)
Q9CPP6	0.0164733	1.38334	NS	NS	NS	NS	Ndufa5	NADH:ubiquinone oxidoreductase subunit A5(Ndufa5)
P42125	0.000220601	1.36922	NS	NS	0.0348192	0.343709	Eci1	enoyl-Coenzyme A delta isomerase 1(Eci1)
Q9CQZ6	0.00247998	1.36857	0.00593824	0.761706	0.02345	0.797252	Ndufb3	NADH:ubiquinone oxidoreductase subunit B3(Ndufb3)
Q9CQQ7	0.00096097	1.36558	NS	NS	NS	NS	Atp5pb	ATP synthase peripheral stalk-membrane subunit b(Atp5pb)
P02088	0.00824316	1.35139	0.0135078	0.81645	NS	NS	Hbb-b1	hemoglobin, beta adult major chain(Hbb-b1)
Q9EQ20	0.00138927	1.3488	NS	NS	NS	NS	Aldh6a1	aldehyde dehydrogenase family 6, subfamily A1(Aldh6a1)
Q9WTP6	0.00338649	1.3482	NS	NS	NS	NS	Ak2	adenylate kinase 2(Ak2)
Q99KI0	3.18725e-05	1.34675	NS	NS	NS	NS	Aco2	aconitase 2, mitochondrial(Aco2)
Q9CQA3	0.000246024	1.3467	NS	NS	NS	NS	Sdhb	succinate dehydrogenase complex, subunit B, iron sulfur (Ip)(Sdhb)
P47738	0.000449415	1.34633	0.012085	0.744153	NS	NS	Aldh2	aldehyde dehydrogenase 2, mitochondrial(Aldh2)
O35459	5.29482e-06	1.34476	NS	NS	NS	NS	Ech1	enoyl coenzyme A hydratase 1, peroxisomal(Ech1)
Q9DB20	0.00273659	1.34457	NS	NS	NS	NS	Atp5o	ATP synthase, H+ transporting, mitochondrial F1 complex, O subunit(Atp5o)
Q3ULD5	0.0444425	1.3389	NS	NS	NS	NS	Mccc2	methylcrotonoyl-Coenzyme A carboxylase 2 (beta)(Mccc2)
P97807	0.00790385	1.33792	NS	NS	NS	NS	Fh1	fumarate hydratase 1(Fh1)
Q9DCX2	0.00288605	1.33718	NS	NS	NS	NS	Atp5h	ATP synthase, H+ transporting, mitochondrial F0 complex, subunit D(Atp5h)
P50752	0.000373437	1.33475	NS	NS	NS	NS	Tnnt2	troponin T2, cardiac(Tnnt2)
O08749	0.00059589	1.3341	NS	NS	NS	NS	Dld	dihydrolipoamide dehydrogenase(Dld)
Q8QZS1	0.00472636	1.3294	NS	NS	NS	NS	Hibch	3-hydroxyisobutyryl-Coenzyme A hydrolase(Hibch)
Q8VEM8	0.000882223	1.32891	NS	NS	NS	NS	Slc25a3	solute carrier family 25 (mitochondrial carrier, phosphate carrier), member 3(Slc25a3)
P41216	0.000106594	1.32839	0.0192034	0.85795	NS	NS	Acsl1	acyl-CoA synthetase long-chain family member 1(Acsl1)
Q78IK2	0.000703719	1.3261	NS	NS	NS	NS	Atp5md	ATP synthase membrane subunit DAPIT(Atp5md)
P56480	6.95072e-08	1.32437	NS	NS	NS	NS	Atp5b	ATP synthase, H+ transporting mitochondrial F1 complex, beta subunit(Atp5b)
O09111	0.0029512	1.32383	NS	NS	NS	NS	Ndufb11	NADH:ubiquinone oxidoreductase subunit B11(Ndufb11)
Q8BWT1	3.10281e-06	1.32363	NS	NS	NS	NS	Acaa2	acetyl-Coenzyme A acyltransferase 2 (mitochondrial 3-oxoacyl-Coenzyme A thiolase)(Acaa2)
Q9CQ62	0.000587895	1.32123	NS	NS	NS	NS	Decr1	2,4-dienoyl CoA reductase 1, mitochondrial(Decr1)
Q62425	0.00255393	1.31625	NS	NS	NS	NS	Ndufa4	Ndufa4, mitochondrial complex associated(Ndufa4)
Q9Z2I9	5.93369e-05	1.3159	NS	NS	NS	NS	Sucla2	succinate-Coenzyme A ligase, ADP-forming, beta subunit(Sucla2)
P04117	0.00583397	1.30879	NS	NS	NS	NS	Fabp4	fatty acid binding protein 4, adipocyte(Fabp4)
P48962	0.000244351	1.30658	NS	NS	NS	NS	Slc25a4	solute carrier family 25 (mitochondrial carrier, adenine nucleotide translocator), member 4(Slc25a4)
P53395	0.00546416	1.30587	NS	NS	NS	NS	Dbt	dihydrolipoamide branched chain transacylase E2(Dbt)
P19123	0.00386189	1.30186	0.00471362	0.773558	NS	NS	Tnnc1	troponin C, cardiac/slow skeletal(Tnnc1)
Q91VR2	0.000484071	1.30086	NS	NS	NS	NS	Atp5c1	ATP synthase, H+ transporting, mitochondrial F1 complex, gamma polypeptide 1(Atp5c1)
Q8BMS1	2.10627e-06	1.2996	0.00459749	0.87713	NS	NS	Hadha	hydroxyacyl-CoA dehydrogenase trifunctional multienzyme complex subunit alpha(Hadha)
P62984	0.00266855	1.29274	NS	NS	NS	NS	Uba52	ubiquitin A-52 residue ribosomal protein fusion product 1(Uba52)
P09542	0.00014413	1.29253	NS	NS	NS	NS	Myl3	myosin, light polypeptide 3(Myl3)
Q9DB77	0.000969742	1.29214	NS	NS	NS	NS	Uqcrc2	ubiquinol cytochrome c reductase core protein 2(Uqcrc2)
Q9CR84	4.62477e-06	1.28757	NS	NS	NS	NS	Atp5g1	ATP synthase, H+ transporting, mitochondrial F0 complex, subunit C1 (subunit 9)(Atp5g1)
Q99NB1	0.000288482	1.28392	NS	NS	NS	NS	Acss1	acyl-CoA synthetase short-chain family member 1(Acss1)
P47857	0.00109585	1.2832	NS	NS	NS	NS	Pfkm	phosphofructokinase, muscle(Pfkm)
Q9DCT2	0.000581101	1.27964	NS	NS	NS	NS	Ndufs3	NADH:ubiquinone oxidoreductase core subunit S3(Ndufs3)
Q9D172	0.00276986	1.27714	NS	NS	NS	NS	Gatd3a	glutamine amidotransferase like class 1 domain containing 3A(Gatd3a)
P04247	0.000108926	1.27691	NS	NS	NS	NS	Mb	myoglobin(Mb)
Q921G7	2.93919e-07	1.27676	NS	NS	NS	NS	Etfdh	electron transferring flavoprotein, dehydrogenase(Etfdh)
O88342	0.0210033	1.27285	0.0229526	1.2673	NS	NS	Wdr1	WD repeat domain 1(Wdr1)
P16858	0.000268564	1.27253	NS	NS	NS	NS	Gapdh	glyceraldehyde-3-phosphate dehydrogenase(Gapdh)
Q99JY0	2.65723e-05	1.27196	NS	NS	NS	NS	Hadhb	hydroxyacyl-CoA dehydrogenase trifunctional multienzyme complex subunit beta(Hadhb)
Q7TQ48	0.00209335	1.26595	0.0133053	0.83416	NS	NS	Srl	sarcalumenin(Srl)
P45952	0.000150423	1.26303	NS	NS	NS	NS	Acadm	acyl-Coenzyme A dehydrogenase, medium chain(Acadm)
Q6P8J7	2.11906e-08	1.26284	0.0024839	0.913413	NS	NS	Ckmt2	creatine kinase, mitochondrial 2(Ckmt2)
Q07417	0.00973559	1.26111	NS	NS	NS	NS	Acads	acyl-Coenzyme A dehydrogenase, short chain(Acads)
P50544	0.000113496	1.26094	NS	NS	NS	NS	Acadvl	acyl-Coenzyme A dehydrogenase, very long chain(Acadvl)
P20108	0.00194588	1.25811	NS	NS	NS	NS	Prdx3	peroxiredoxin 3(Prdx3)
P19783	8.57037e-06	1.25634	NS	NS	NS	NS	Cox4i1	cytochrome c oxidase subunit 4I1(Cox4i1)
Q8BFR5	0.000346673	1.25594	NS	NS	NS	NS	Tufm	Tu translation elongation factor, mitochondrial(Tufm)
Q9D8N0	0.00126888	1.25576	NS	NS	NS	NS	Eef1g	eukaryotic translation elongation factor 1 gamma(Eef1g)
P99029	0.0184539	1.25545	NS	NS	NS	NS	Prdx5	peroxiredoxin 5(Prdx5)
P14152	0.000379242	1.2539	NS	NS	NS	NS	Mdh1	malate dehydrogenase 1, NAD (soluble)(Mdh1)
Q9CQ92	0.0377181	1.24635	NS	NS	NS	NS	Fis1	fission, mitochondrial 1(Fis1)
O55143	0.000306545	1.24375	0.0027962	0.843132	NS	NS	Atp2a2	ATPase, Ca++ transporting, cardiac muscle, slow twitch 2(Atp2a2)
Q8R4N0	0.00918983	1.24076	0.0103679	0.811913	NS	NS	Clybl	citrate lyase beta like(Clybl)
P56391	0.00758188	1.24066	NS	NS	NS	NS	Cox6b1	cytochrome c oxidase, subunit 6B1(Cox6b1)
Q9JHI5	0.000297503	1.23921	NS	NS	NS	NS	Ivd	isovaleryl coenzyme A dehydrogenase(Ivd)
P68033	0.000558234	1.23885	0.00632515	0.730195	NS	NS	Actc1	actin, alpha, cardiac muscle 1(Actc1)
Q03265	0.000151048	1.23669	NS	NS	NS	NS	Atp5a1	ATP synthase, H+ transporting, mitochondrial F1 complex, alpha subunit 1(Atp5a1)
P17182	0.00446885	1.23651	NS	NS	NS	NS	Eno1	enolase 1, alpha non-neuron(Eno1)
Q8QZT1	0.00315015	1.23468	NS	NS	NS	NS	Acat1	acetyl-Coenzyme A acetyltransferase 1(Acat1)
Q8VDN2	0.00235426	1.23016	0.031159	1.14789	NS	NS	Atp1a1	ATPase, Na+/K+ transporting, alpha 1 polypeptide(Atp1a1)
Q9D0M3	0.0310792	1.22964	NS	NS	0.0393723	0.4	Cyc1	cytochrome c-1(Cyc1)
P17751	0.00919106	1.22442	NS	NS	NS	NS	Tpi1	triosephosphate isomerase 1(Tpi1)
Q60870	0.0153707	1.22108	NS	NS	NS	NS	Reep5	receptor accessory protein 5(Reep5)
Q4ZJM7	0.0461699	1.21978	NS	NS	NS	NS	Otol1	otolin 1(Otol1)
P62880	0.0241799	1.21804	0.00350337	0.741974	NS	NS	Gnb2	guanine nucleotide binding protein (G protein), beta 2(Gnb2)
P20029	0.0355474	1.21605	NS	NS	NS	NS	Hspa5	heat shock protein 5(Hspa5)
P97450	0.00268392	1.215	NS	NS	NS	NS	Atp5j	ATP synthase, H+ transporting, mitochondrial F0 complex, subunit F(Atp5j)
Q9WUR9	0.0357187	1.2149	NS	NS	NS	NS	Ak4	adenylate kinase 4(Ak4)
Q9DC69	0.0149176	1.21131	NS	NS	NS	NS	Ndufa9	NADH:ubiquinone oxidoreductase subunit A9(Ndufa9)
O70250	0.00377502	1.21121	0.000859981	1.25724	NS	NS	Pgam2	phosphoglycerate mutase 2(Pgam2)
Q9D2G2	0.00213616	1.20961	NS	NS	NS	NS	Dlst	dihydrolipoamide S-succinyltransferase (E2 component of 2-oxo-glutarate complex)(Dlst)
P07310	6.23897e-07	1.20504	0.0163364	1.07096	NS	NS	Ckm	creatine kinase, muscle(Ckm)
Q9ERS2	0.00515202	1.20135	NS	NS	NS	NS	Ndufa13	NADH:ubiquinone oxidoreductase subunit A13(Ndufa13)
Q9D051	0.000450001	1.19885	0.000171056	0.819302	NS	NS	Pdhb	pyruvate dehydrogenase (lipoamide) beta(Pdhb)
P08228	0.00266851	1.19848	0.00641081	1.17445	NS	NS	Sod1	superoxide dismutase 1, soluble(Sod1)
Q9CR61	0.0201653	1.19795	NS	NS	NS	NS	Ndufb7	NADH:ubiquinone oxidoreductase subunit B7(Ndufb7)
Q9D6R2	0.0451181	1.19784	NS	NS	0.0322222	0.418051	Idh3a	isocitrate dehydrogenase 3 (NAD+) alpha(Idh3a)
P43407	0.0117126	0.831394	0.030329	0.856271	NS	NS	Sdc2	syndecan 2(Sdc2)
Q8R516	0.0263238	0.830328	NS	NS	NS	NS	Mib2	mindbomb E3 ubiquitin protein ligase 2(Mib2)
Q8K1Z0	0.0371937	0.82917	NS	NS	NS	NS	Coq9	coenzyme Q9(Coq9)
P27773	0.0189072	0.828081	0.0114851	1.24468	NS	NS	Pdia3	protein disulfide isomerase associated 3(Pdia3)
Q01853	0.0034395	0.827162	0.0182076	1.15662	NS	NS	Vcp	valosin containing protein(Vcp)
O88532	0.0458707	0.823942	NS	NS	NS	NS	Zfr	zinc finger RNA binding protein(Zfr)
Q8VHX6	0.0409743	0.819571	0.0133133	1.28281	NS	NS	Flnc	filamin C, gamma(Flnc)
P61021	0.0213041	0.819047	0.0141928	1.24009	NS	NS	Rab5b	RAB5B, member RAS oncogene family(Rab5b)
P26041	0.00610929	0.815272	0.000807743	1.42067	NS	NS	Msn	moesin(Msn)
Q62188	0.0189711	0.814438	0.0132643	1.2439	NS	NS	Dpysl3	dihydropyrimidinase-like 3(Dpysl3)
Q62261	0.0139106	0.812802	0.00435094	1.27914	NS	NS	Sptbn1	spectrin beta, non-erythrocytic 1(Sptbn1)
Q9QXG4	0.00519244	0.808751	0.0133862	1.20153	NS	NS	Acss2	acyl-CoA synthetase short-chain family member 2(Acss2)
Q8BGD8	0.0408267	0.804687	NS	NS	NS	NS	Coa6	cytochrome c oxidase assembly factor 6(Coa6)
Q60953	0.00272628	0.802759	0.00324174	1.2397	NS	NS	Pml	promyelocytic leukemia(Pml)
Q91V98	0.0268233	0.802233	NS	NS	NS	NS	Cd248	CD248 antigen, endosialin(Cd248)
Q3TWW8	0.0256989	0.801183	NS	NS	NS	NS	Srsf6	serine and arginine-rich splicing factor 6(Srsf6)
Q6PB66	0.0440135	0.801168	NS	NS	NS	NS	Lrpprc	leucine-rich PPR-motif containing(Lrpprc)
Q60980	0.00538129	0.797107	NS	NS	NS	NS	Klf3	Kruppel-like factor 3 (basic)(Klf3)
O54724	0.00164905	0.795484	NS	NS	NS	NS	Cavin1	caveolae associated 1(Cavin1)
Q9Z188	0.0213082	0.794676	NS	NS	NS	NS	Dyrk1b	dual-specificity tyrosine-(Y)-phosphorylation regulated kinase 1b(Dyrk1b)
P50462	0.00491138	0.794629	0.00630465	0.800784	NS	NS	Csrp3	cysteine and glycine-rich protein 3(Csrp3)
Q3UZA1	0.00927081	0.794334	NS	NS	NS	NS	Rcsd1	RCSD domain containing 1(Rcsd1)
P14869	0.0230546	0.794066	NS	NS	0.00502177	1.43	Rplp0	ribosomal protein, large, P0(Rplp0)
Q6PDG5	0.00908492	0.792934	NS	NS	NS	NS	Smarcc2	SWI/SNF related, matrix associated, actin dependent regulator of chromatin, subfamily c, member 2(Smarcc2)
P70213	0.0298233	0.79136	NS	NS	NS	NS	Fv1	Friend virus susceptibility 1(Fv1)
P13541	0.0497037	0.790676	NS	NS	NS	NS	Myh3	myosin, heavy polypeptide 3, skeletal muscle, embryonic(Myh3)
F6ZDS4	0.000362956	0.790476	0.000877603	1.23998	NS	NS	Tpr	translocated promoter region, nuclear basket protein(Tpr)
Q9R069	0.0120384	0.787536	NS	NS	NS	NS	Bcam	basal cell adhesion molecule(Bcam)
Q3U1Y4	0.0440033	0.78708	0.00418508	1.44379	NS	NS	Dennd4b	DENN/MADD domain containing 4B(Dennd4b)
Q64727	0.000418177	0.784393	NS	NS	NS	NS	Vcl	vinculin(Vcl)
P57776	0.000175806	0.783703	NS	NS	NS	NS	Eef1d	eukaryotic translation elongation factor 1 delta (guanine nucleotide exchange protein)(Eef1d)
P35283	0.0141488	0.779753	NS	NS	NS	NS	Rab12	RAB12, member RAS oncogene family(Rab12)
P54731	0.0014686	0.778805	0.00151235	1.28292	NS	NS	Faf1	Fas-associated factor 1(Faf1)
Q8K019	0.000106262	0.777714	0.00256926	1.19973	NS	NS	Bclaf1	BCL2-associated transcription factor 1(Bclaf1)
O08784	0.0184832	0.777599	NS	NS	NS	NS	Tcof1	treacle ribosome biogenesis factor 1(Tcof1)
P68404	0.00691712	0.777549	0.0189221	0.807205	NS	NS	Prkcb	protein kinase C, beta(Prkcb)
Q6P6L0	0.0240148	0.775329	NS	NS	NS	NS	Filip1l	filamin A interacting protein 1-like(Filip1l)
Q8K4Z0	0.0481918	0.774113	NS	NS	NS	NS	Lgi2	leucine-rich repeat LGI family, member 2(Lgi2)
Q9D1L0	0.0159813	0.773783	NS	NS	NS	NS	Chchd2	coiled-coil-helix-coiled-coil-helix domain containing 2(Chchd2)
Q8CI51	0.00171379	0.773622	NS	NS	0.0388671	0.555665	Pdlim5	PDZ and LIM domain 5(Pdlim5)
Q6PDN3	0.0445062	0.7735	0.0458713	1.28938	NS	NS	Mylk	myosin, light polypeptide kinase(Mylk)
Q9D0B0	0.00569935	0.772796	NS	NS	NS	NS	Srsf9	serine and arginine-rich splicing factor 9(Srsf9)
Q8R3V6	0.0222502	0.772539	0.00998057	1.37518	NS	NS	Cuedc1	CUE domain containing 1(Cuedc1)
Q3UMF0	0.00331873	0.771132	0.00033281	1.40062	NS	NS	Cobll1	Cobl-like 1(Cobll1)
A2ASS6	0.00133198	0.771064	0.00281303	0.572748	NS	NS	Ttn	titin(Ttn)
Q99PL6	0.0113277	0.770857	NS	NS	NS	NS	Ubxn6	UBX domain protein 6(Ubxn6)
Q921F4	0.0294702	0.770544	NS	NS	NS	NS	Hnrnpll	heterogeneous nuclear ribonucleoprotein L-like(Hnrnpll)
Q8BL97	0.00345828	0.768231	NS	NS	NS	NS	Srsf7	serine and arginine-rich splicing factor 7(Srsf7)
Q80UP8	0.00104293	0.767746	0.0141222	1.13788	NS	NS	Slc20a2	solute carrier family 20, member 2(Slc20a2)
Q6NZN0	0.0230807	0.764042	NS	NS	NS	NS	Rbm26	RNA binding motif protein 26(Rbm26)
Q8BGU5	5.2408e-05	0.76356	NS	NS	NS	NS	Ccny	cyclin Y(Ccny)
Q9CQV8	0.0433066	0.763301	NS	NS	NS	NS	Ywhab	tyrosine 3-monooxygenase/tryptophan 5-monooxygenase activation protein, beta polypeptide(Ywhab)
Q3TLI0	0.0233778	0.761928	NS	NS	NS	NS	Trappc10	trafficking protein particle complex 10(Trappc10)
P27546	0.000358992	0.761755	NS	NS	NS	NS	Map4	microtubule-associated protein 4(Map4)
P01872	0.0016353	0.761527	NS	NS	NS	NS	Ighm	immunoglobulin heavy constant mu(Ighm)
Q9EST5	0.0242584	0.761522	0.0133689	0.738355	NS	NS	Anp32b	acidic (leucine-rich) nuclear phosphoprotein 32 family, member B(Anp32b)
Q2TBE6	0.00037125	0.759682	NS	NS	NS	NS	Pi4k2a	phosphatidylinositol 4-kinase type 2 alpha(Pi4k2a)
Q6A0D4	0.00304481	0.759225	NS	NS	0.00996495	1.22464	Rftn1	raftlin lipid raft linker 1(Rftn1)
P63017	0.000884414	0.759029	NS	NS	NS	NS	Hspa8	heat shock protein 8(Hspa8)
Q3UHD3	3.90958e-05	0.757929	0.000987081	1.22588	NS	NS	Mtus2	microtubule associated tumor suppressor candidate 2(Mtus2)
E9Q6P5	0.00109764	0.756056	NS	NS	NS	NS	Ttc7b	tetratricopeptide repeat domain 7B(Ttc7b)
A2AMM0	0.00280538	0.755235	NS	NS	NS	NS	Cavin4	caveolae associated 4(Cavin4)
P51125	0.00931335	0.753783	0.00118997	0.609665	NS	NS	Cast	calpastatin(Cast)
P48678	0.00085602	0.751979	0.0146295	1.21018	NS	NS	Lmna	lamin A(Lmna)
O55028	0.000299194	0.750861	NS	NS	0.0373448	0.617009	Bckdk	branched chain ketoacid dehydrogenase kinase(Bckdk)
Q8K1H7	0.0102301	0.748688	0.00494722	1.38044	NS	NS	Tcp11l2	t-complex 11 (mouse) like 2(Tcp11l2)
A2AJI0	0.000235525	0.748377	NS	NS	NS	NS	Map7d1	MAP7 domain containing 1(Map7d1)
Q01815	0.00297191	0.740689	NS	NS	NS	NS	Cacna1c	calcium channel, voltage-dependent, L type, alpha 1C subunit(Cacna1c)
D3YXK2	0.00372415	0.739375	NS	NS	0.0474359	0.594343	Safb	scaffold attachment factor B(Safb)
P83741	5.08373e-05	0.738935	NS	NS	NS	NS	Wnk1	WNK lysine deficient protein kinase 1(Wnk1)
Q9DAZ9	0.00808114	0.738852	NS	NS	NS	NS	Zfyve19	zinc finger, FYVE domain containing 19(Zfyve19)
B2RY56	0.00110867	0.738281	NS	NS	NS	NS	Rbm25	RNA binding motif protein 25(Rbm25)
Q8JZQ9	0.000354625	0.737224	NS	NS	NS	NS	Eif3b	eukaryotic translation initiation factor 3, subunit B(Eif3b)
Q8BGV8	0.000792136	0.737024	0.0309729	1.19117	NS	NS	Mief1	mitochondrial elongation factor 1(Mief1)
Q8BTI8	5.21629e-05	0.736978	NS	NS	NS	NS	Srrm2	serine/arginine repetitive matrix 2(Srrm2)
O54962	0.00500572	0.735984	NS	NS	NS	NS	Banf1	BAF nuclear assembly factor 1(Banf1)
Q64096	0.0387938	0.735432	0.0310259	0.72312	NS	NS	Mcf2l	mcf.2 transforming sequence-like(Mcf2l)
Q91YE8	4.88589e-05	0.735336	7.49571e-05	1.34589	0.0220223	0.609252	Synpo2	synaptopodin 2(Synpo2)
P70698	0.00112527	0.734911	NS	NS	NS	NS	Ctps	cytidine 5'-triphosphate synthase(Ctps)
Q8BGD9	0.00105682	0.733929	NS	NS	NS	NS	Eif4b	eukaryotic translation initiation factor 4B(Eif4b)
Q3UHJ0	1.66492e-05	0.729038	6.17686e-06	1.40665	NS	NS	Aak1	AP2 associated kinase 1(Aak1)
Q9ET54	0.000202569	0.726159	0.004704	1.25168	NS	NS	Palld	palladin, cytoskeletal associated protein(Palld)
Q8BI72	0.000870431	0.725976	NS	NS	NS	NS	Cdkn2aip	CDKN2A interacting protein(Cdkn2aip)
Q9JJW5	5.06583e-05	0.72425	0.0170219	1.18188	NS	NS	Myoz2	myozenin 2(Myoz2)
Q9CSN1	0.00105784	0.723566	NS	NS	NS	NS	Snw1	SNW domain containing 1(Snw1)
P70399	0.005856	0.722581	NS	NS	NS	NS	Trp53bp1	transformation related protein 53 binding protein 1(Trp53bp1)
Q6P4S6	0.0105063	0.721556	NS	NS	NS	NS	Sik3	SIK family kinase 3(Sik3)
P70333	0.000234282	0.72115	0.000830858	1.32921	NS	NS	Hnrnph2	heterogeneous nuclear ribonucleoprotein H2(Hnrnph2)
Q62048	0.00299829	0.719522	NS	NS	NS	NS	Pea15a	proliferation and apoptosis adaptor protein 15A(Pea15a)
Q8BZF8	0.00894342	0.719221	NS	NS	NS	NS	Pgm5	phosphoglucomutase 5(Pgm5)
Q80XU3	0.00245892	0.718571	NS	NS	NS	NS	Nucks1	nuclear casein kinase and cyclin-dependent kinase substrate 1(Nucks1)
Q8R361	0.0277605	0.714611	0.0398717	1.35917	NS	NS	Rab11fip5	RAB11 family interacting protein 5 (class I)(Rab11fip5)
A2AIV2	0.000465461	0.714394	NS	NS	NS	NS	Virma	vir like m6A methyltransferase associated(Virma)
Q60668	0.00027036	0.714232	NS	NS	NS	NS	Hnrnpd	heterogeneous nuclear ribonucleoprotein D(Hnrnpd)
Q8BGC0	0.0133485	0.713532	NS	NS	NS	NS	Htatsf1	HIV TAT specific factor 1(Htatsf1)
Q9DBC7	0.000161515	0.713011	NS	NS	NS	NS	Prkar1a	protein kinase, cAMP dependent regulatory, type I, alpha(Prkar1a)
Q61235	3.50704e-05	0.711385	NS	NS	NS	NS	Sntb2	syntrophin, basic 2(Sntb2)
Q62417	0.0380496	0.711076	NS	NS	NS	NS	Sorbs1	sorbin and SH3 domain containing 1(Sorbs1)
P62071	0.000165375	0.710356	NS	NS	NS	NS	Rras2	related RAS viral (r-ras) oncogene 2(Rras2)
Q8VBT0	0.00138644	0.710033	NS	NS	NS	NS	Tmx1	thioredoxin-related transmembrane protein 1(Tmx1)
Q3UW53	0.00092065	0.709725	NS	NS	NS	NS	Niban1	niban apoptosis regulator 1(Niban1)
P26883	0.0231929	0.70962	NS	NS	NS	NS	Fkbp1a	FK506 binding protein 1a(Fkbp1a)
Q921T2	0.00296779	0.7094	NS	NS	NS	NS	Tor1aip1	torsin A interacting protein 1(Tor1aip1)
P53986	3.12259e-06	0.709011	NS	NS	0.0216793	0.731306	Slc16a1	solute carrier family 16 (monocarboxylic acid transporters), member 1(Slc16a1)
O35295	0.00904347	0.708717	NS	NS	NS	NS	Purb	purine rich element binding protein B(Purb)
Q3UIR3	0.00402753	0.708547	NS	NS	NS	NS	Dtx3l	deltex 3-like, E3 ubiquitin ligase(Dtx3l)
P68181	0.0281272	0.707975	NS	NS	NS	NS	Prkacb	protein kinase, cAMP dependent, catalytic, beta(Prkacb)
Q91YN9	0.000896778	0.707135	0.000620018	1.4643	NS	NS	Bag2	BCL2-associated athanogene 2(Bag2)
Q8C0E3	0.000873568	0.706402	NS	NS	NS	NS	Trim47	tripartite motif-containing 47(Trim47)
Q80XQ2	0.00524142	0.705007	NS	NS	0.0215916	0.789983	Tbc1d5	TBC1 domain family, member 5(Tbc1d5)
Q9ES28	0.00630716	0.704861	NS	NS	NS	NS	Arhgef7	Rho guanine nucleotide exchange factor (GEF7)(Arhgef7)
Q62318	0.00984997	0.704388	NS	NS	NS	NS	Trim28	tripartite motif-containing 28(Trim28)
E9Q1P8	0.000123708	0.704048	NS	NS	NS	NS	Irf2bp2	interferon regulatory factor 2 binding protein 2(Irf2bp2)
Q52KI8	1.85889e-05	0.7024	NS	NS	0.0395886	0.545253	Srrm1	serine/arginine repetitive matrix 1(Srrm1)
Q80Y81	0.00962432	0.702323	NS	NS	NS	NS	Elac2	elaC ribonuclease Z 2(Elac2)
Q9CZX7	0.00254606	0.701349	NS	NS	NS	NS	Pip4p2	phosphatidylinositol-4,5-bisphosphate 4-phosphatase 2(Pip4p2)
Q3TLH4	0.000907047	0.701239	NS	NS	NS	NS	Prrc2c	proline-rich coiled-coil 2C(Prrc2c)
Q9WV60	0.00150052	0.700988	NS	NS	NS	NS	Gsk3b	glycogen synthase kinase 3 beta(Gsk3b)
Q62093	0.0138462	0.700912	NS	NS	NS	NS	Srsf2	serine and arginine-rich splicing factor 2(Srsf2)
Q3UJU9	9.04686e-05	0.700799	NS	NS	0.0487854	1.7199	Rmdn3	regulator of microtubule dynamics 3(Rmdn3)
Q02248	4.0932e-05	0.70065	NS	NS	NS	NS	Ctnnb1	catenin (cadherin associated protein), beta 1(Ctnnb1)
O08715	0.000223708	0.700637	NS	NS	NS	NS	Akap1	A kinase (PRKA) anchor protein 1(Akap1)
Q9CRD0	0.00520296	0.69871	NS	NS	NS	NS	Ociad1	OCIA domain containing 1(Ociad1)
P61082	1.18378e-05	0.698318	0.0114741	1.18884	NS	NS	Ube2m	ubiquitin-conjugating enzyme E2M(Ube2m)
P70313	0.000299397	0.697944	NS	NS	NS	NS	Nos3	nitric oxide synthase 3, endothelial cell(Nos3)
Q0VBL3	0.0204181	0.696991	NS	NS	NS	NS	Rbm15	RNA binding motif protein 15(Rbm15)
Q9ESZ8	0.0012888	0.696904	NS	NS	NS	NS	Gtf2i	general transcription factor II I(Gtf2i)
P36552	0.000536022	0.696246	NS	NS	NS	NS	Cpox	coproporphyrinogen oxidase(Cpox)
Q8CHQ0	0.00939593	0.695779	NS	NS	NS	NS	Fbxo4	F-box protein 4(Fbxo4)
P97863	0.000152708	0.694312	NS	NS	NS	NS	Nfib	nuclear factor I/B(Nfib)
Q91ZA3	0.0191744	0.693828	NS	NS	NS	NS	Pcca	propionyl-Coenzyme A carboxylase, alpha polypeptide(Pcca)
Q80W47	3.56402e-06	0.692972	0.000703925	1.26725	NS	NS	Wipi2	WD repeat domain, phosphoinositide interacting 2(Wipi2)
Q8CJ53	0.000335725	0.692958	NS	NS	NS	NS	Trip10	thyroid hormone receptor interactor 10(Trip10)
Q14DQ1	0.00573411	0.692182	NS	NS	NS	NS	Fam219b	family with sequence similarity 219, member B(Fam219b)
Q9ET78	4.76984e-08	0.692136	NS	NS	NS	NS	Jph2	junctophilin 2(Jph2)
Q6PAM0	0.00852373	0.69211	NS	NS	0.0131093	1.45	Prkab2	protein kinase, AMP-activated, beta 2 non-catalytic subunit(Prkab2)
Q60597	0.0385531	0.691982	0.00661818	0.594893	NS	NS	Ogdh	oxoglutarate (alpha-ketoglutarate) dehydrogenase (lipoamide)(Ogdh)
Q569Z6	1.09276e-06	0.691361	NS	NS	NS	NS	Thrap3	thyroid hormone receptor associated protein 3(Thrap3)
Q62219	2.9825e-06	0.690355	NS	NS	0.00283711	1.4334	Tgfb1i1	transforming growth factor beta 1 induced transcript 1(Tgfb1i1)
Q99MD6	0.000248954	0.689496	NS	NS	NS	NS	Txnrd3	thioredoxin reductase 3(Txnrd3)
Q80U58	0.0012804	0.689226	NS	NS	NS	NS	Pum2	pumilio RNA-binding family member 2(Pum2)
Q6P9R2	0.00964182	0.689193	NS	NS	NS	NS	Oxsr1	oxidative-stress responsive 1(Oxsr1)
Q99PL5	0.00116867	0.689053	0.0022686	0.731607	NS	NS	Rrbp1	ribosome binding protein 1(Rrbp1)
Q9WVT6	0.00717438	0.68893	NS	NS	NS	NS	Car14	carbonic anhydrase 14(Car14)
Q149B8	7.50543e-08	0.688813	0.00563132	1.15081	NS	NS	Perm1	PPARGC1 and ESRR induced regulator, muscle 1(Perm1)
Q9CZJ2	1.19468e-08	0.688772	0.000262917	1.20503	NS	NS	Hspa12b	heat shock protein 12B(Hspa12b)
P42208	6.95182e-05	0.688393	NS	NS	NS	NS	Septin2	septin 2(Septin2)
Q63918	0.000715481	0.68758	NS	NS	NS	NS	Cavin2	caveolae associated 2(Cavin2)
Q5EG47	0.0024672	0.686966	NS	NS	NS	NS	Prkaa1	protein kinase, AMP-activated, alpha 1 catalytic subunit(Prkaa1)
Q8BP27	1.09229e-06	0.686467	NS	NS	NS	NS	Sfr1	SWI5 dependent recombination repair 1(Sfr1)
Q8C079	0.0120156	0.686186	NS	NS	NS	NS	Strip1	striatin interacting protein 1(Strip1)
Q6PFR5	4.04892e-05	0.68592	NS	NS	NS	NS	Tra2a	transformer 2 alpha(Tra2a)
Q9Z2C4	0.000437748	0.685836	0.0383968	1.22006	NS	NS	Mtmr1	myotubularin related protein 1(Mtmr1)
Q99JB8	6.7259e-05	0.684563	NS	NS	NS	NS	Pacsin3	protein kinase C and casein kinase substrate in neurons 3(Pacsin3)
Q9JJZ4	0.0116739	0.684255	NS	NS	NS	NS	Ube2j1	ubiquitin-conjugating enzyme E2J 1(Ube2j1)
Q8C206	0.00143512	0.683308	NS	NS	NS	NS	Gpr157	G protein-coupled receptor 157(Gpr157)
Q62422	0.000838021	0.682622	NS	NS	0.00205835	1.28	Ostf1	osteoclast stimulating factor 1(Ostf1)
G5E870	0.00045889	0.681848	NS	NS	NS	NS	Trip12	thyroid hormone receptor interactor 12(Trip12)
P97855	0.000412351	0.681721	NS	NS	0.0206585	2.15806	G3bp1	GTPase activating protein (SH3 domain) binding protein 1(G3bp1)
P63101	0.000265733	0.681548	NS	NS	NS	NS	Ywhaz	tyrosine 3-monooxygenase/tryptophan 5-monooxygenase activation protein, zeta polypeptide(Ywhaz)
E9Q4Z2	3.5774e-06	0.680168	0.0029839	1.22864	NS	NS	Acacb	acetyl-Coenzyme A carboxylase beta(Acacb)
Q61234	0.000193234	0.679502	0.0331615	1.2186	NS	NS	Snta1	syntrophin, acidic 1(Snta1)
Q9WTQ5	0.00156065	0.678864	NS	NS	NS	NS	Akap12	A kinase (PRKA) anchor protein (gravin) 12(Akap12)
Q3UHX2	0.00109576	0.6782	NS	NS	0.0139268	1.65	Pdap1	PDGFA associated protein 1(Pdap1)
Q9CWK3	0.000182292	0.678075	NS	NS	NS	NS	Cd2bp2	CD2 cytoplasmic tail binding protein 2(Cd2bp2)
Q69ZR2	0.000716221	0.677337	NS	NS	NS	NS	Hectd1	HECT domain E3 ubiquitin protein ligase 1(Hectd1)
Q8BJU0	1.69733e-06	0.676903	0.00553964	1.1993	NS	NS	Sgta	small glutamine-rich tetratricopeptide repeat (TPR)-containing, alpha(Sgta)
Q9JHU2	6.18032e-07	0.676634	0.00407572	1.20109	NS	NS	Palmd	palmdelphin(Palmd)
P49586	0.000104791	0.675397	NS	NS	NS	NS	Pcyt1a	phosphate cytidylyltransferase 1, choline, alpha isoform(Pcyt1a)
Q6ZQB6	4.64691e-05	0.674976	NS	NS	NS	NS	Ppip5k2	diphosphoinositol pentakisphosphate kinase 2(Ppip5k2)
Q61584	0.00101225	0.6748	NS	NS	NS	NS	Fxr1	FMR1 autosomal homolog 1(Fxr1)
Q6ZQ03	0.000547229	0.674418	NS	NS	NS	NS	Fnbp4	formin binding protein 4(Fnbp4)
Q9JM73	5.75369e-05	0.674287	NS	NS	NS	NS	Srf	serum response factor(Srf)
Q8R3Y8	0.000678988	0.674248	NS	NS	NS	NS	Irf2bp1	interferon regulatory factor 2 binding protein 1(Irf2bp1)
P26231	0.00056946	0.673592	0.0110721	1.23074	NS	NS	Ctnna1	catenin (cadherin associated protein), alpha 1(Ctnna1)
Q61136	0.00604891	0.673496	NS	NS	NS	NS	Prpf4b	pre-mRNA processing factor 4B(Prpf4b)
Q3V3A7	0.00157264	0.672831	NS	NS	NS	NS	Rnf207	ring finger protein 207(Rnf207)
Q5DTJ9	2.08543e-05	0.67261	NS	NS	NS	NS	Mypn	myopalladin(Mypn)
B9EJ86	0.000922415	0.67112	NS	NS	NS	NS	Osbpl8	oxysterol binding protein-like 8(Osbpl8)
Q9CQF4	3.36421e-05	0.669385	NS	NS	NS	NS	Mtres1	mitochondrial transcription rescue factor 1(Mtres1)
Q70KF4	2.52129e-05	0.668396	NS	NS	NS	NS	Cmya5	cardiomyopathy associated 5(Cmya5)
P09470	1.24603e-05	0.668168	NS	NS	NS	NS	Ace	angiotensin I converting enzyme (peptidyl-dipeptidase A) 1(Ace)
Q8C0E2	0.00454021	0.667967	0.0152374	1.37448	NS	NS	Vps26b	VPS26 retromer complex component B(Vps26b)
O35551	0.00121965	0.665724	NS	NS	NS	NS	Rabep1	rabaptin, RAB GTPase binding effector protein 1(Rabep1)
Q99MS7	4.877e-05	0.665129	NS	NS	NS	NS	Ehbp1l1	EH domain binding protein 1-like 1(Ehbp1l1)
Q8K4Q0	0.000513245	0.665114	NS	NS	NS	NS	Rptor	regulatory associated protein of MTOR, complex 1(Rptor)
Q99KG3	0.000161087	0.663497	NS	NS	NS	NS	Rbm10	RNA binding motif protein 10(Rbm10)
P35486	1.28805e-05	0.663335	NS	NS	NS	NS	Pdha1	pyruvate dehydrogenase E1 alpha 1(Pdha1)
Q8BG05	0.000272568	0.662115	NS	NS	0.0167856	1.24	Hnrnpa3	heterogeneous nuclear ribonucleoprotein A3(Hnrnpa3)
Q9QXM1	0.009205	0.662027	NS	NS	NS	NS	Jmy	junction-mediating and regulatory protein(Jmy)
Q3UQS8	6.28117e-08	0.661581	NS	NS	NS	NS	Rbm20	RNA binding motif protein 20(Rbm20)
Q3UPL0	0.000591333	0.660839	0.00908653	1.21974	NS	NS	Sec31a	Sec31 homolog A (S. cerevisiae)(Sec31a)
Q8K1L5	0.00639943	0.658735	NS	NS	NS	NS	Ppp1r11	protein phosphatase 1, regulatory inhibitor subunit 11(Ppp1r11)
Q9DAQ4	0.0237275	0.65688	NS	NS	NS	NS	1700003E16Rik	RIKEN cDNA 1700003E16 gene(1700003E16Rik)
Q9CZW5	5.48339e-05	0.655513	NS	NS	NS	NS	Tomm70a	translocase of outer mitochondrial membrane 70A(Tomm70a)
O70589	0.000657379	0.652702	NS	NS	NS	NS	Cask	calcium/calmodulin-dependent serine protein kinase (MAGUK family)(Cask)
Q921C5	0.00287952	0.652584	NS	NS	NS	NS	Bicd2	BICD cargo adaptor 2(Bicd2)
Q9WTX2	0.000829094	0.652046	NS	NS	NS	NS	Prkra	protein kinase, interferon inducible double stranded RNA dependent activator(Prkra)
P97792	0.000329928	0.650042	NS	NS	NS	NS	Cxadr	coxsackie virus and adenovirus receptor(Cxadr)
Q8BH64	0.000115852	0.649951	NS	NS	NS	NS	Ehd2	EH-domain containing 2(Ehd2)
P10711	0.00246965	0.648546	NS	NS	NS	NS	Tcea1	transcription elongation factor A (SII) 1(Tcea1)
Q9JJG0	0.000126215	0.648241	NS	NS	0.0120074	0.670821	Tacc2	transforming, acidic coiled-coil containing protein 2(Tacc2)
Q9DB70	0.00128109	0.647988	NS	NS	NS	NS	Fundc1	FUN14 domain containing 1(Fundc1)
Q8K3W3	0.000450426	0.64789	NS	NS	NS	NS	Casc3	cancer susceptibility candidate 3(Casc3)
Q05793	0.00163058	0.647743	NS	NS	NS	NS	Hspg2	perlecan (heparan sulfate proteoglycan 2)(Hspg2)
Q8CHU3	3.3955e-05	0.646511	NS	NS	NS	NS	Epn2	epsin 2(Epn2)
Q65CL1	0.00141621	0.645818	NS	NS	0.0259991	1.86332	Ctnna3	catenin (cadherin associated protein), alpha 3(Ctnna3)
B1AZA5	1.99414e-05	0.644874	NS	NS	NS	NS	Tmem245	transmembrane protein 245(Tmem245)
Q9ES83	3.6692e-05	0.644465	NS	NS	NS	NS	Bves	blood vessel epicardial substance(Bves)
O70133	1.35317e-05	0.643977	NS	NS	NS	NS	Dhx9	DEAH (Asp-Glu-Ala-His) box polypeptide 9(Dhx9)
P62259	0.000246702	0.643391	NS	NS	NS	NS	Ywhae	tyrosine 3-monooxygenase/tryptophan 5-monooxygenase activation protein, epsilon polypeptide(Ywhae)
Q9D8T7	5.17e-05	0.643104	NS	NS	NS	NS	Slirp	SRA stem-loop interacting RNA binding protein(Slirp)
Q8VH51	0.00118895	0.642117	NS	NS	NS	NS	Rbm39	RNA binding motif protein 39(Rbm39)
E9Q7G0	0.00242677	0.641845	0.00926807	1.35839	NS	NS	Numa1	nuclear mitotic apparatus protein 1(Numa1)
Q9R0P4	8.20376e-05	0.641334	NS	NS	NS	NS	1110004F10Rik	RIKEN cDNA 1110004F10 gene(1110004F10Rik)
Q9CQV4	8.47139e-06	0.641008	NS	NS	NS	NS	Retreg3	reticulophagy regulator family member 3(Retreg3)
Q9R1Z8	0.0221769	0.640291	NS	NS	NS	NS	Sorbs3	sorbin and SH3 domain containing 3(Sorbs3)
O09044	9.91723e-05	0.639604	NS	NS	NS	NS	Snap23	synaptosomal-associated protein 23(Snap23)
P50543	8.77242e-05	0.639386	NS	NS	NS	NS	S100a11	S100 calcium binding protein A11(S100a11)
P70271	0.00326112	0.638894	NS	NS	NS	NS	Pdlim4	PDZ and LIM domain 4(Pdlim4)
P97496	0.019984	0.636647	NS	NS	NS	NS	Smarcc1	SWI/SNF related, matrix associated, actin dependent regulator of chromatin, subfamily c, member 1(Smarcc1)
P62960	0.000456044	0.636249	NS	NS	NS	NS	Ybx1	Y box protein 1(Ybx1)
P35383	0.000402755	0.632717	NS	NS	NS	NS	P2ry2	purinergic receptor P2Y, G-protein coupled 2(P2ry2)
Q5FW52	1.1792e-05	0.63208	NS	NS	NS	NS	Mlip	muscular LMNA-interacting protein(Mlip)
Q64012	1.71413e-06	0.631883	NS	NS	NS	NS	Raly	hnRNP-associated with lethal yellow(Raly)
Q8VEK3	7.08681e-06	0.631818	NS	NS	NS	NS	Hnrnpu	heterogeneous nuclear ribonucleoprotein U(Hnrnpu)
A2AAJ9	0.00340191	0.630858	NS	NS	NS	NS	Obscn	obscurin, cytoskeletal calmodulin and titin-interacting RhoGEF(Obscn)
Q9Z0U1	0.000142715	0.630014	NS	NS	NS	NS	Tjp2	tight junction protein 2(Tjp2)
P47955	0.0191253	0.62978	NS	NS	6.80277e-08	1.7051	Rplp1	ribosomal protein, large, P1(Rplp1)
Q8K012	0.00205812	0.629614	NS	NS	NS	NS	Fnbp1l	formin binding protein 1-like(Fnbp1l)
Q8R344	0.00100742	0.628616	NS	NS	0.000155238	1.7	Ccdc12	coiled-coil domain containing 12(Ccdc12)
P39447	8.43583e-06	0.626973	NS	NS	NS	NS	Tjp1	tight junction protein 1(Tjp1)
Q4VA53	0.00595283	0.626668	NS	NS	NS	NS	Pds5b	PDS5 cohesin associated factor B(Pds5b)
Q3UTJ2	4.90988e-07	0.626422	0.0422182	1.14975	NS	NS	Sorbs2	sorbin and SH3 domain containing 2(Sorbs2)
C0HKD9	0.000170789	0.626014	NS	NS	0.00676691	1.14037	Mfap1b	microfibrillar-associated protein 1B(Mfap1b)
P63094	4.7386e-06	0.625817	NS	NS	NS	NS	Gnas	GNAS (guanine nucleotide binding protein, alpha stimulating) complex locus(Gnas)
Q6PD03	0.000440937	0.625736	NS	NS	NS	NS	Ppp2r5a	protein phosphatase 2, regulatory subunit B', alpha(Ppp2r5a)
P70452	0.000619288	0.624905	NS	NS	NS	NS	Stx4a	syntaxin 4A (placental)(Stx4a)
P58871	1.21532e-05	0.624799	NS	NS	NS	NS	Tnks1bp1	tankyrase 1 binding protein 1(Tnks1bp1)
Q99J36	0.000180996	0.624565	NS	NS	NS	NS	Thumpd1	THUMP domain containing 1(Thumpd1)
Q9DBS9	5.37201e-06	0.624343	NS	NS	NS	NS	Osbpl3	oxysterol binding protein-like 3(Osbpl3)
Q8BRK8	0.031996	0.623622	NS	NS	NS	NS	Prkaa2	protein kinase, AMP-activated, alpha 2 catalytic subunit(Prkaa2)
O70548	7.47135e-05	0.623473	NS	NS	NS	NS	Tcap	titin-cap(Tcap)
Q8CGB6	2.15313e-06	0.622318	NS	NS	NS	NS	Tns2	tensin 2(Tns2)
Q9R078	0.000157136	0.622084	NS	NS	NS	NS	Prkab1	protein kinase, AMP-activated, beta 1 non-catalytic subunit(Prkab1)
Q8VDQ8	0.000468857	0.621485	NS	NS	0.0266562	1.45	Sirt2	sirtuin 2(Sirt2)
P35831	0.00038499	0.620976	NS	NS	NS	NS	Ptpn12	protein tyrosine phosphatase, non-receptor type 12(Ptpn12)
Q9Z1E4	4.85578e-06	0.619914	NS	NS	NS	NS	Gys1	glycogen synthase 1, muscle(Gys1)
E9Q401	2.21136e-06	0.618989	NS	NS	NS	NS	Ryr2	ryanodine receptor 2, cardiac(Ryr2)
Q6ZQ58	0.000158555	0.61894	NS	NS	NS	NS	Larp1	La ribonucleoprotein domain family, member 1(Larp1)
Q9D0L8	4.52902e-05	0.618289	NS	NS	NS	NS	Rnmt	RNA (guanine-7-) methyltransferase(Rnmt)
Q8R4X3	0.00218955	0.617916	NS	NS	NS	NS	Rbm12	RNA binding motif protein 12(Rbm12)
Q8R0T2	0.000871723	0.615972	NS	NS	NS	NS	Zfp768	zinc finger protein 768(Zfp768)
Q9JI99	0.000201172	0.615858	NS	NS	NS	NS	Sgpp1	sphingosine-1-phosphate phosphatase 1(Sgpp1)
Q920A7	0.0010132	0.615312	NS	NS	NS	NS	Afg3l1	AFG3-like AAA ATPase 1(Afg3l1)
Q80TV8	0.000833464	0.615296	NS	NS	NS	NS	Clasp1	CLIP associating protein 1(Clasp1)
Q91W69	0.000586941	0.613892	NS	NS	NS	NS	Epn3	epsin 3(Epn3)
Q61165	1.17654e-06	0.611613	NS	NS	NS	NS	Slc9a1	solute carrier family 9 (sodium/hydrogen exchanger), member 1(Slc9a1)
A2AQ25	0.00040286	0.611442	NS	NS	NS	NS	Etl4	enhancer trap locus 4(Etl4)
Q8BXA1	0.0197006	0.608618	NS	NS	5.47954e-05	2.28	Golim4	golgi integral membrane protein 4(Golim4)
Q8JZX4	2.03203e-05	0.607962	NS	NS	NS	NS	Rbm17	RNA binding motif protein 17(Rbm17)
P06837	0.00026982	0.607447	0.0263506	1.15249	NS	NS	Gap43	growth associated protein 43(Gap43)
Q80TY0	0.00039238	0.60737	NS	NS	NS	NS	Fnbp1	formin binding protein 1(Fnbp1)
Q7TPW1	7.08333e-06	0.607188	NS	NS	NS	NS	Nexn	nexilin(Nexn)
Q7TMY8	2.13192e-06	0.606029	NS	NS	NS	NS	Huwe1	HECT, UBA and WWE domain containing 1(Huwe1)
Q64735	0.000855287	0.605906	0.0331248	0.760628	NS	NS	Cr1l	complement component (3b/4b) receptor 1-like(Cr1l)
Q9JK91	1.97488e-05	0.605753	NS	NS	NS	NS	Mlh1	mutL homolog 1(Mlh1)
Q9WVC3	8.02503e-05	0.603888	NS	NS	NS	NS	Cav2	caveolin 2(Cav2)
Q91ZU6	0.0168756	0.603786	NS	NS	NS	NS	Dst	dystonin(Dst)
Q9QYG0	3.88734e-07	0.603252	NS	NS	NS	NS	Ndrg2	N-myc downstream regulated gene 2(Ndrg2)
Q07113	0.000504528	0.601788	NS	NS	NS	NS	Igf2r	insulin-like growth factor 2 receptor(Igf2r)
Q6P542	0.0099504	0.601662	NS	NS	NS	NS	Abcf1	ATP-binding cassette, sub-family F (GCN20), member 1(Abcf1)
Q91ZV0	0.0199903	0.601251	NS	NS	NS	NS	Mia2	MIA SH3 domain ER export factor 2(Mia2)
P23242	6.27806e-05	0.601029	NS	NS	NS	NS	Gja1	gap junction protein, alpha 1(Gja1)
O55003	0.000104249	0.600749	NS	NS	NS	NS	Bnip3	BCL2/adenovirus E1B interacting protein 3(Bnip3)
Q62234	0.0228238	0.600278	NS	NS	0.0255959	0.703763	Myom1	myomesin 1(Myom1)
O88738	0.000804816	0.600238	NS	NS	NS	NS	Birc6	baculoviral IAP repeat-containing 6(Birc6)
D3Z1D3	0.00354783	0.600027	NS	NS	NS	NS	3425401B19Rik	RIKEN cDNA 3425401B19 gene(3425401B19Rik)
Q8C8R3	0.0292459	0.59964	NS	NS	NS	NS	Ank2	ankyrin 2, brain(Ank2)
P14142	0.0172363	0.599345	NS	NS	NS	NS	Slc2a4	solute carrier family 2 (facilitated glucose transporter), member 4(Slc2a4)
Q69ZX8	0.00177796	0.598903	NS	NS	NS	NS	Ablim3	actin binding LIM protein family, member 3(Ablim3)
Q9QZS8	0.0392941	0.598029	NS	NS	NS	NS	Sh2d3c	SH2 domain containing 3C(Sh2d3c)
Q8R4S0	1.03942e-06	0.597491	NS	NS	NS	NS	Ppp1r14c	protein phosphatase 1, regulatory inhibitor subunit 14C(Ppp1r14c)
Q149T7	0.000459225	0.597462	NS	NS	NS	NS	Ppm1j	protein phosphatase 1J(Ppm1j)
Q9JMD3	0.00226407	0.596302	NS	NS	NS	NS	Stard10	START domain containing 10(Stard10)
Q8R1B4	3.44154e-05	0.595582	NS	NS	NS	NS	Eif3c	eukaryotic translation initiation factor 3, subunit C(Eif3c)
P10637	1.23314e-06	0.595075	NS	NS	NS	NS	Mapt	microtubule-associated protein tau(Mapt)
O54988	0.00145607	0.595021	NS	NS	NS	NS	Slk	STE20-like kinase(Slk)
Q9CR86	7.96799e-05	0.594939	0.0183442	1.29675	NS	NS	Carhsp1	calcium regulated heat stable protein 1(Carhsp1)
Q8BQZ4	0.00063988	0.592216	NS	NS	NS	NS	Ralgapb	Ral GTPase activating protein, beta subunit (non-catalytic)(Ralgapb)
Q00PI9	1.45204e-05	0.59196	0.0171104	1.08489	NS	NS	Hnrnpul2	heterogeneous nuclear ribonucleoprotein U-like 2(Hnrnpul2)
Q8R550	0.0114819	0.591201	NS	NS	NS	NS	Sh3kbp1	SH3-domain kinase binding protein 1(Sh3kbp1)
Q8CEL2	0.0152937	0.590763	NS	NS	NS	NS	Cfap61	cilia and flagella associated protein 61(Cfap61)
P70288	0.0196859	0.589633	NS	NS	NS	NS	Hdac2	histone deacetylase 2(Hdac2)
O55022	0.00523381	0.588842	NS	NS	NS	NS	Pgrmc1	progesterone receptor membrane component 1(Pgrmc1)
Q62407	1.19897e-08	0.588367	0.0110311	1.14154	NS	NS	Speg	SPEG complex locus(Speg)
Q8VCE2	4.32131e-05	0.587993	NS	NS	NS	NS	Gpn1	GPN-loop GTPase 1(Gpn1)
Q99LD4	0.00297608	0.587625	NS	NS	NS	NS	Gps1	G protein pathway suppressor 1(Gps1)
Q9JLV1	3.61362e-05	0.587232	NS	NS	0.0378094	1.55777	Bag3	BCL2-associated athanogene 3(Bag3)
Q8K4L3	0.00149278	0.586822	NS	NS	NS	NS	Svil	supervillin(Svil)
P16283	0.000850415	0.58674	NS	NS	NS	NS	Slc4a3	solute carrier family 4 (anion exchanger), member 3(Slc4a3)
Q9QXZ0	0.000893357	0.585641	NS	NS	NS	NS	Macf1	microtubule-actin crosslinking factor 1(Macf1)
Q99LH9	0.000599054	0.585543	NS	NS	NS	NS	Sh3bp5l	SH3 binding domain protein 5 like(Sh3bp5l)
Q8BH50	0.000754536	0.584477	NS	NS	NS	NS	8030462N17Rik	RIKEN cDNA 8030462N17 gene(8030462N17Rik)
Q8N7N5	8.47915e-06	0.584227	NS	NS	NS	NS	Dcaf8	DDB1 and CUL4 associated factor 8(Dcaf8)
P51859	0.00247428	0.582306	NS	NS	NS	NS	Hdgf	heparin binding growth factor(Hdgf)
Q6PDM2	4.02553e-06	0.581944	0.0317629	1.2111	NS	NS	Srsf1	serine and arginine-rich splicing factor 1(Srsf1)
Q60929	6.76191e-06	0.581912	0.0262257	1.25729	NS	NS	Mef2a	myocyte enhancer factor 2A(Mef2a)
O54774	3.13515e-06	0.580561	NS	NS	NS	NS	Ap3d1	adaptor-related protein complex 3, delta 1 subunit(Ap3d1)
Q99M51	0.000154063	0.578318	NS	NS	NS	NS	Nck1	non-catalytic region of tyrosine kinase adaptor protein 1(Nck1)
Q7TN99	0.00534971	0.576277	NS	NS	NS	NS	Cpeb3	cytoplasmic polyadenylation element binding protein 3(Cpeb3)
P61014	1.49525e-06	0.575511	NS	NS	NS	NS	Pln	phospholamban(Pln)
Q9JIX8	0.00740395	0.573924	NS	NS	NS	NS	Acin1	apoptotic chromatin condensation inducer 1(Acin1)
Q99L43	8.64245e-05	0.573524	NS	NS	NS	NS	Cds2	CDP-diacylglycerol synthase (phosphatidate cytidylyltransferase) 2(Cds2)
Q3UH68	8.67262e-07	0.571462	NS	NS	NS	NS	Limch1	LIM and calponin homology domains 1(Limch1)
P52479	0.00591697	0.57069	NS	NS	NS	NS	Usp10	ubiquitin specific peptidase 10(Usp10)
Q9QYJ0	0.000142435	0.56996	NS	NS	NS	NS	Dnaja2	DnaJ heat shock protein family (Hsp40) member A2(Dnaja2)
P04627	0.0026818	0.568578	NS	NS	NS	NS	Araf	Araf proto-oncogene, serine/threonine kinase(Araf)
Q5DTM8	7.28301e-05	0.566645	NS	NS	NS	NS	Rnf20	ring finger protein 20(Rnf20)
Q9JKS4	0.000751351	0.565719	0.000228637	1.226	NS	NS	Ldb3	LIM domain binding 3(Ldb3)
Q9D0L7	0.0255605	0.564163	NS	NS	NS	NS	Armc10	armadillo repeat containing 10(Armc10)
Q8BZX4	0.000759268	0.559832	NS	NS	NS	NS	Srek1	splicing regulatory glutamine/lysine-rich protein 1(Srek1)
Q64338	5.86175e-05	0.558635	NS	NS	NS	NS	Pde1c	phosphodiesterase 1C(Pde1c)
Q9JMK2	1.60222e-06	0.558621	NS	NS	NS	NS	Csnk1e	casein kinase 1, epsilon(Csnk1e)
Q9DBG7	0.0472023	0.556286	NS	NS	NS	NS	Srpr	signal recognition particle receptor ('docking protein')(Srpr)
P30999	2.1063e-05	0.553237	NS	NS	NS	NS	Ctnnd1	catenin (cadherin associated protein), delta 1(Ctnnd1)
Q9DC77	1.41657e-05	0.551689	NS	NS	NS	NS	Smpx	small muscle protein, X-linked(Smpx)
Q60760	4.78236e-08	0.549786	NS	NS	NS	NS	Grb10	growth factor receptor bound protein 10(Grb10)
Q8CI08	1.02817e-07	0.547093	NS	NS	NS	NS	Slain2	SLAIN motif family, member 2(Slain2)
Q68FF6	0.000124529	0.545002	NS	NS	NS	NS	Git1	GIT ArfGAP 1(Git1)
Q9WUD1	0.0001242	0.543347	0.00130172	0.71665	NS	NS	Stub1	STIP1 homology and U-Box containing protein 1(Stub1)
Q61033	0.000320287	0.543135	NS	NS	NS	NS	Tmpo	thymopoietin(Tmpo)
Q3UJB9	0.0209381	0.542352	NS	NS	NS	NS	Edc4	enhancer of mRNA decapping 4(Edc4)
Q9CRA5	3.03202e-05	0.541437	NS	NS	NS	NS	Golph3	golgi phosphoprotein 3(Golph3)
Q8CI95	0.000553864	0.536791	NS	NS	NS	NS	Osbpl11	oxysterol binding protein-like 11(Osbpl11)
P50136	7.39414e-08	0.536765	0.0120223	0.811702	0.0319871	0.412952	Bckdha	branched chain ketoacid dehydrogenase E1, alpha polypeptide(Bckdha)
Q7TQD2	1.79475e-06	0.535996	NS	NS	NS	NS	Tppp	tubulin polymerization promoting protein(Tppp)
Q3TIR3	1.71459e-05	0.534619	NS	NS	NS	NS	Ric8a	RIC8 guanine nucleotide exchange factor A(Ric8a)
Q99MR1	0.0415079	0.532931	NS	NS	NS	NS	Gigyf1	GRB10 interacting GYF protein 1(Gigyf1)
P26369	0.000243525	0.532787	NS	NS	NS	NS	U2af2	U2 small nuclear ribonucleoprotein auxiliary factor (U2AF) 2(U2af2)
A2A5R2	0.000118727	0.532066	NS	NS	NS	NS	Arfgef2	ADP-ribosylation factor guanine nucleotide-exchange factor 2 (brefeldin A-inhibited)(Arfgef2)
P50580	0.000452949	0.531711	NS	NS	0.0176293	2.99189	Pa2g4	proliferation-associated 2G4(Pa2g4)
Q6NZJ6	4.04353e-08	0.531454	NS	NS	NS	NS	Eif4g1	eukaryotic translation initiation factor 4, gamma 1(Eif4g1)
O35379	0.00151585	0.529747	NS	NS	NS	NS	Abcc1	ATP-binding cassette, sub-family C (CFTR/MRP), member 1(Abcc1)
Q9D5T0	9.27805e-05	0.529607	NS	NS	NS	NS	Atad1	ATPase family, AAA domain containing 1(Atad1)
P45591	1.57023e-05	0.529112	NS	NS	NS	NS	Cfl2	cofilin 2, muscle(Cfl2)
Q8VDM6	0.00269762	0.527777	NS	NS	NS	NS	Hnrnpul1	heterogeneous nuclear ribonucleoprotein U-like 1(Hnrnpul1)
Q5BL07	0.000256584	0.523419	NS	NS	NS	NS	Pex1	peroxisomal biogenesis factor 1(Pex1)
Q8CJ61	0.000568992	0.522036	NS	NS	NS	NS	Cmtm4	CKLF-like MARVEL transmembrane domain containing 4(Cmtm4)
Q8C4Y3	0.00022198	0.521499	0.0208117	0.827069	0.0281874	1.42	Nelfb	negative elongation factor complex member B(Nelfb)
Q8C6M1	0.000127473	0.518338	0.00511119	1.28421	NS	NS	Usp20	ubiquitin specific peptidase 20(Usp20)
P54116	8.65306e-05	0.517678	0.016511	1.31489	NS	NS	Stom	stomatin(Stom)
Q9D394	0.000534313	0.516121	NS	NS	NS	NS	Rufy3	RUN and FYVE domain containing 3(Rufy3)
P98203	2.46478e-06	0.515098	NS	NS	NS	NS	Arvcf	armadillo repeat gene deleted in velocardiofacial syndrome(Arvcf)
Q7TSH2	3.17659e-05	0.51508	NS	NS	NS	NS	Phkb	phosphorylase kinase beta(Phkb)
Q9R020	1.64867e-05	0.514635	0.000952551	1.26682	NS	NS	Zranb2	zinc finger, RAN-binding domain containing 2(Zranb2)
Q9CT10	1.48647e-05	0.513572	NS	NS	NS	NS	Ranbp3	RAN binding protein 3(Ranbp3)
Q9R0P5	1.89236e-06	0.507562	NS	NS	NS	NS	Dstn	destrin(Dstn)
Q3TZZ7	0.00796113	0.506114	NS	NS	NS	NS	Esyt2	extended synaptotagmin-like protein 2(Esyt2)
Q8C9H6	2.82791e-06	0.492711	0.00297551	0.847862	NS	NS	Strip2	striatin interacting protein 2(Strip2)
Q9Z1D1	0.000263994	0.491027	0.0291799	0.822913	NS	NS	Eif3g	eukaryotic translation initiation factor 3, subunit G(Eif3g)
Q9Z1Z0	0.00136784	0.489695	0.0461609	0.773369	NS	NS	Uso1	USO1 vesicle docking factor(Uso1)
Q05BC3	2.35078e-05	0.488968	7.96581e-05	0.591049	NS	NS	Eml1	echinoderm microtubule associated protein like 1(Eml1)
P51830	0.00124924	0.485095	NS	NS	NS	NS	Adcy9	adenylate cyclase 9(Adcy9)
Q8CBH5	9.8814e-05	0.4847	0.0499609	1.1377	NS	NS	Mfsd6	major facilitator superfamily domain containing 6(Mfsd6)
Q80YV2	7.37533e-05	0.482897	0.0379347	1.14151	NS	NS	Zc3hc1	zinc finger, C3HC type 1(Zc3hc1)
O70435	0.00021055	0.481225	NS	NS	NS	NS	Psma3	proteasome subunit alpha 3(Psma3)
P59017	2.49926e-06	0.480764	0.00511593	0.693963	NS	NS	Bcl2l13	BCL2-like 13 (apoptosis facilitator)(Bcl2l13)
Q9D4H1	0.00021846	0.478439	0.0345782	1.19976	NS	NS	Exoc2	exocyst complex component 2(Exoc2)
Q9Z2A0	0.000184779	0.477574	0.0103419	0.776175	NS	NS	Pdpk1	3-phosphoinositide dependent protein kinase 1(Pdpk1)
Q8BUR4	0.00031758	0.477207	NS	NS	NS	NS	Dock1	dedicator of cytokinesis 1(Dock1)
Q8VHR5	1.60218e-06	0.473314	NS	NS	0.0176479	1.79	Gatad2b	GATA zinc finger domain containing 2B(Gatad2b)
Q3B7Z2	1.16953e-06	0.469993	0.0069553	0.92213	NS	NS	Osbp	oxysterol binding protein(Osbp)
Q99L45	0.00907249	0.46997	NS	NS	0.00139604	1.89236	Eif2s2	eukaryotic translation initiation factor 2, subunit 2 (beta)(Eif2s2)
Q9Z239	0.000103629	0.468194	NS	NS	NS	NS	Fxyd1	FXYD domain-containing ion transport regulator 1(Fxyd1)
Q9DC22	0.00208469	0.466067	NS	NS	NS	NS	Dcaf6	DDB1 and CUL4 associated factor 6(Dcaf6)
Q7TQ95	4.23044e-06	0.464011	0.000195676	0.746742	NS	NS	Lnpk	lunapark, ER junction formation factor(Lnpk)
Q99P72	0.000239636	0.463868	NS	NS	NS	NS	Rtn4	reticulon 4(Rtn4)
Q60876	0.00112441	0.463856	NS	NS	NS	NS	Eif4ebp1	eukaryotic translation initiation factor 4E binding protein 1(Eif4ebp1)
Q61586	0.000192525	0.46009	NS	NS	0.00502177	1.43	Gpam	glycerol-3-phosphate acyltransferase, mitochondrial(Gpam)
Q9WTK7	0.00788898	0.451482	NS	NS	NS	NS	Stk11	serine/threonine kinase 11(Stk11)
Q9WVR4	0.000284645	0.449026	NS	NS	NS	NS	Fxr2	FMR1 autosomal homolog 2(Fxr2)
Q8BR65	0.000493138	0.4481	0.0271575	1.30246	NS	NS	Suds3	suppressor of defective silencing 3 homolog (S. cerevisiae)(Suds3)
Q3UHZ5	2.94365e-08	0.448013	NS	NS	NS	NS	Lmod2	leiomodin 2 (cardiac)(Lmod2)
Q8CDG3	9.88237e-05	0.447469	NS	NS	NS	NS	Vcpip1	valosin containing protein (p97)/p47 complex interacting protein 1(Vcpip1)
Q5H8C4	0.00895969	0.446659	NS	NS	NS	NS	Vps13a	vacuolar protein sorting 13A(Vps13a)
P35564	1.09705e-11	0.445228	0.0205501	0.85046	NS	NS	Canx	calnexin(Canx)
Q61151	0.000189006	0.441993	NS	NS	NS	NS	Ppp2r5e	protein phosphatase 2, regulatory subunit B', epsilon(Ppp2r5e)
Q9Z1N9	6.7249e-06	0.435542	0.0100976	1.18814	NS	NS	Unc13b	unc-13 homolog B(Unc13b)
Q9D6W8	0.00295568	0.429154	NS	NS	NS	NS	Borcs6	BLOC-1 related complex subunit 6(Borcs6)
O35071	6.25983e-05	0.427268	NS	NS	NS	NS	Kif1c	kinesin family member 1C(Kif1c)
Q5GIG6	0.000138926	0.420328	0.0313439	1.2178	0.0141943	0.385	Tnni3k	TNNI3 interacting kinase(Tnni3k)
P56812	2.20648e-07	0.415744	0.00051765	1.13224	NS	NS	Pdcd5	programmed cell death 5(Pdcd5)
Q6P9Q4	2.00538e-06	0.413804	0.000249185	1.29912	9.22862e-11	2.5936	Fhod1	formin homology 2 domain containing 1(Fhod1)
Q8CC27	5.32219e-05	0.413447	0.0226603	0.839771	NS	NS	Cacnb2	calcium channel, voltage-dependent, beta 2 subunit(Cacnb2)
Q8K2K6	5.91133e-08	0.412586	NS	NS	NS	NS	Agfg1	ArfGAP with FG repeats 1(Agfg1)
Q05D44	0.00217607	0.408658	NS	NS	NS	NS	Eif5b	eukaryotic translation initiation factor 5B(Eif5b)
P39054	0.000196915	0.406766	0.0199261	0.772699	NS	NS	Dnm2	dynamin 2(Dnm2)
P18760	0.000168673	0.393744	NS	NS	NS	NS	Cfl1	cofilin 1, non-muscle(Cfl1)
Q8K2L8	0.000210394	0.391435	NS	NS	NS	NS	Trappc12	trafficking protein particle complex 12(Trappc12)
Q91VK1	3.06776e-06	0.387995	0.000259665	0.734127	6.09146e-05	1.639	Bzw2	basic leucine zipper and W2 domains 2(Bzw2)
Q9JKB3	1.94847e-05	0.385301	0.0137205	1.18587	NS	NS	Ybx3	Y box protein 3(Ybx3)
Q9JJV9	0.00166397	0.381403	NS	NS	NS	NS	Scn5a	sodium channel, voltage-gated, type V, alpha(Scn5a)
Q8BVF2	0.000129335	0.377105	0.0250668	1.26351	0.0244547	1.67	Pdcl3	phosducin-like 3(Pdcl3)
Q62433	1.41354e-05	0.368869	NS	NS	NS	NS	Ndrg1	N-myc downstream regulated gene 1(Ndrg1)
P59672	0.000535733	0.363759	NS	NS	NS	NS	Anks1	ankyrin repeat and SAM domain containing 1(Anks1)
Q91VC7	7.85698e-09	0.336524	NS	NS	NS	NS	Ppp1r14a	protein phosphatase 1, regulatory inhibitor subunit 14A(Ppp1r14a)
Q8BG67	1.95707e-05	0.319452	NS	NS	NS	NS	Efr3a	EFR3 homolog A(Efr3a)
Q8K1E6	6.4292e-06	0.303368	NS	NS	NS	NS	Alkbh3	alkB homolog 3, alpha-ketoglutarate-dependent dioxygenase(Alkbh3)
